# Supplementary material
Source: PubMed Central journal article supplement (PMC2773194)
Supplement: supp_122_21_3954__2.pdf [file supp_122_21_3954__2.pdf]

**Supplemental Table 1.** Primers for the introduction of Ena/VASP pointmutations

| VASP  | Primer Sequence                                                       |
|-------|-----------------------------------------------------------------------|
| S157A | 5'- CG GAG CAC ATA GAG CGC CGG GTC GCC AAT GCA GGA GGC CCA CC - 3'    |
| S157D | 5'- CG GAG CAC ATA GAG CGC CGG GTC GAC AAT GCA GGA GGC CCA CC - 3'    |
| S239A | 5'- GGA GCC AAA CTC AGG AAA GTC GCC AAG CAG GAG GAG GCC TCA GGG - 3'  |
| S239D | 5'- GGA GCC AAA CTC AGG AAA GTC GAC AAG CAG GAG GAG GCC TCA GGG - 3'  |
| T278A | 5'- G CTG GCC CGG AGA AGG AAA GCC GCG CAA GTT GGG GAG AAA ACC - 3'    |
| T278E | 5'- G CTG GCC CGG AGA AGG AAA GCC GAG CAA GTT GGG GAG AAA ACC - 3'    |
|       |                                                                       |
| Mena* | Primer Sequence                                                       |
| A236D | 5'- A GAG CGC AGA ATG GAC AAT GCT GCT GCC C - 3'                      |
| A376D | 5'- AA CTT AGG AAA GTG GAC CGG GTG GAG GAT GG - 3'                    |
|       |                                                                       |
| EVL   | Primer Sequence                                                       |
| S160A | 5'- GG AAT CTC TAG AAA AGA AGA ACC GCC GCC ACA GGC CCA TCC TCC C - 3' |
| S160D | 5'- GG AAT CTC TAG AAA AGA AGA ACC GAC GCC ACA GGC CCA TCC TCC C - 3' |

\* Phosphomimetic murine Mena mutants AA and DD were kindly provided by FG and subcloned into pcDNA3 vector.
